# Supplementary material for: Genetic interactions between ABA signalling and the Arg/N-end rule pathway during Arabidopsis seedling establishment
Source: PubMed Central journal article supplement (PMC6185960; doi:10.1038/s41598-018-33630-5), 2018-10-12
Supplement: 41598_2018_33630_MOESM1_ESM.pdf [file 41598_2018_33630_MOESM1_ESM.pdf]

## Supplementary Information

### Genetic interactions between ABA signalling and the Arg/N-end rule pathway during Arabidopsis seedling establishment.

Hongtao Zhang<sup>1</sup>, Lucy Gannon<sup>1</sup>, Peter D. Jones<sup>2,3</sup>, Chelsea A. Rundle<sup>1</sup>, Kirsty L. Hassall<sup>4</sup>, Daniel J. Gibbs<sup>5</sup>, Michael J. Holdsworth<sup>2</sup>, Frederica L. Theodoulou<sup>1,\*</sup>

1. Plant Sciences Department, Rothamsted Research, Harpenden, AL5 2JQ, UK
2. School of Biosciences, University of Nottingham, Loughborough, LE12 5RD, UK
3. Current address: Department of Cardiovascular Sciences, University of Leicester, LE3 7QP, UK
4. Computational and Analytical Sciences Department, Rothamsted Research, Harpenden, AL5 2JQ, UK
5. School of Biosciences, University of Birmingham, Edgbaston, B15 2TT UK

\* Corresponding author. Email: [freddie.theodoulou@rothamsted.ac.uk](mailto:freddie.theodoulou@rothamsted.ac.uk)

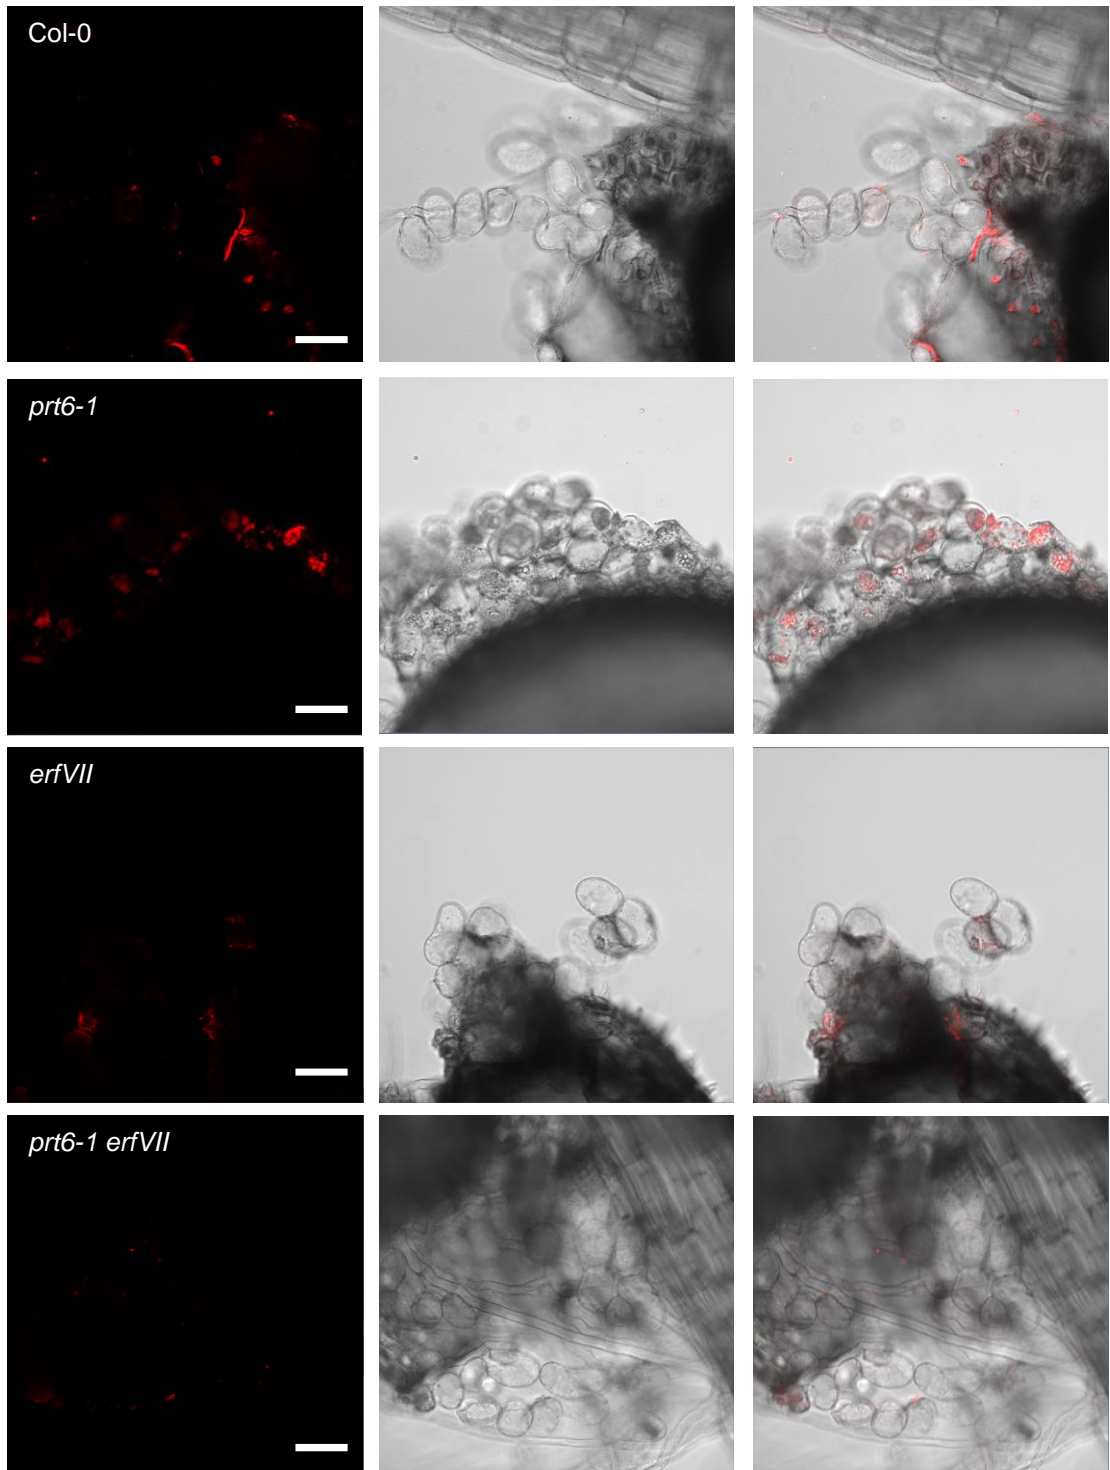

**Supplementary Figure S1 Oil bodies are retained in the endosperm of *prt6* seedlings**

Endosperms and seed coats were dissected from 4 d old seedlings of *prt6-1* and *erfVII* combination mutants, stained with Nile Red and visualised by confocal microscopy. Left panel: Nile Red; middle panel, bright field; right panel, merge. Bar = 50 μm.

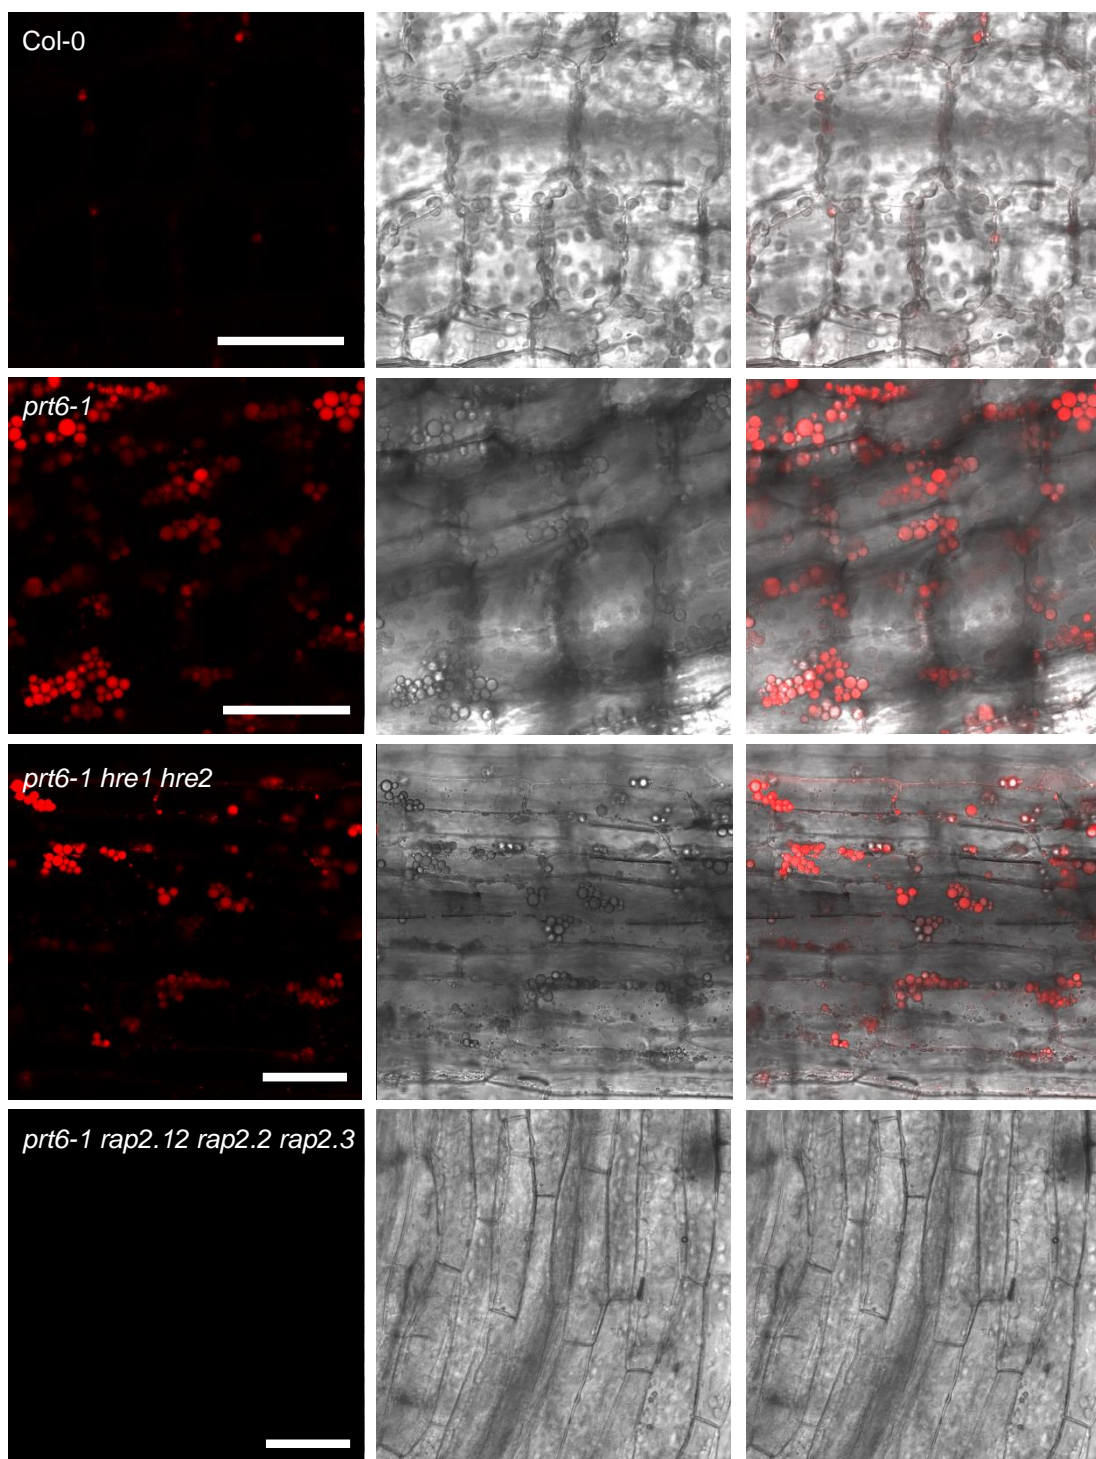

**Supplementary Figure S2. Oil body retention in light-grown *prt6* seedlings is dependent on RAP-type ERFVII transcription factors**

Hypocotyls of 5 d old, light-grown seedlings were stained with Nile Red and visualised by confocal microscopy. Left panel: Nile Red; middle panel, bright field, right panel, merge. Bar = 50  $\mu$ m.

Figure S3

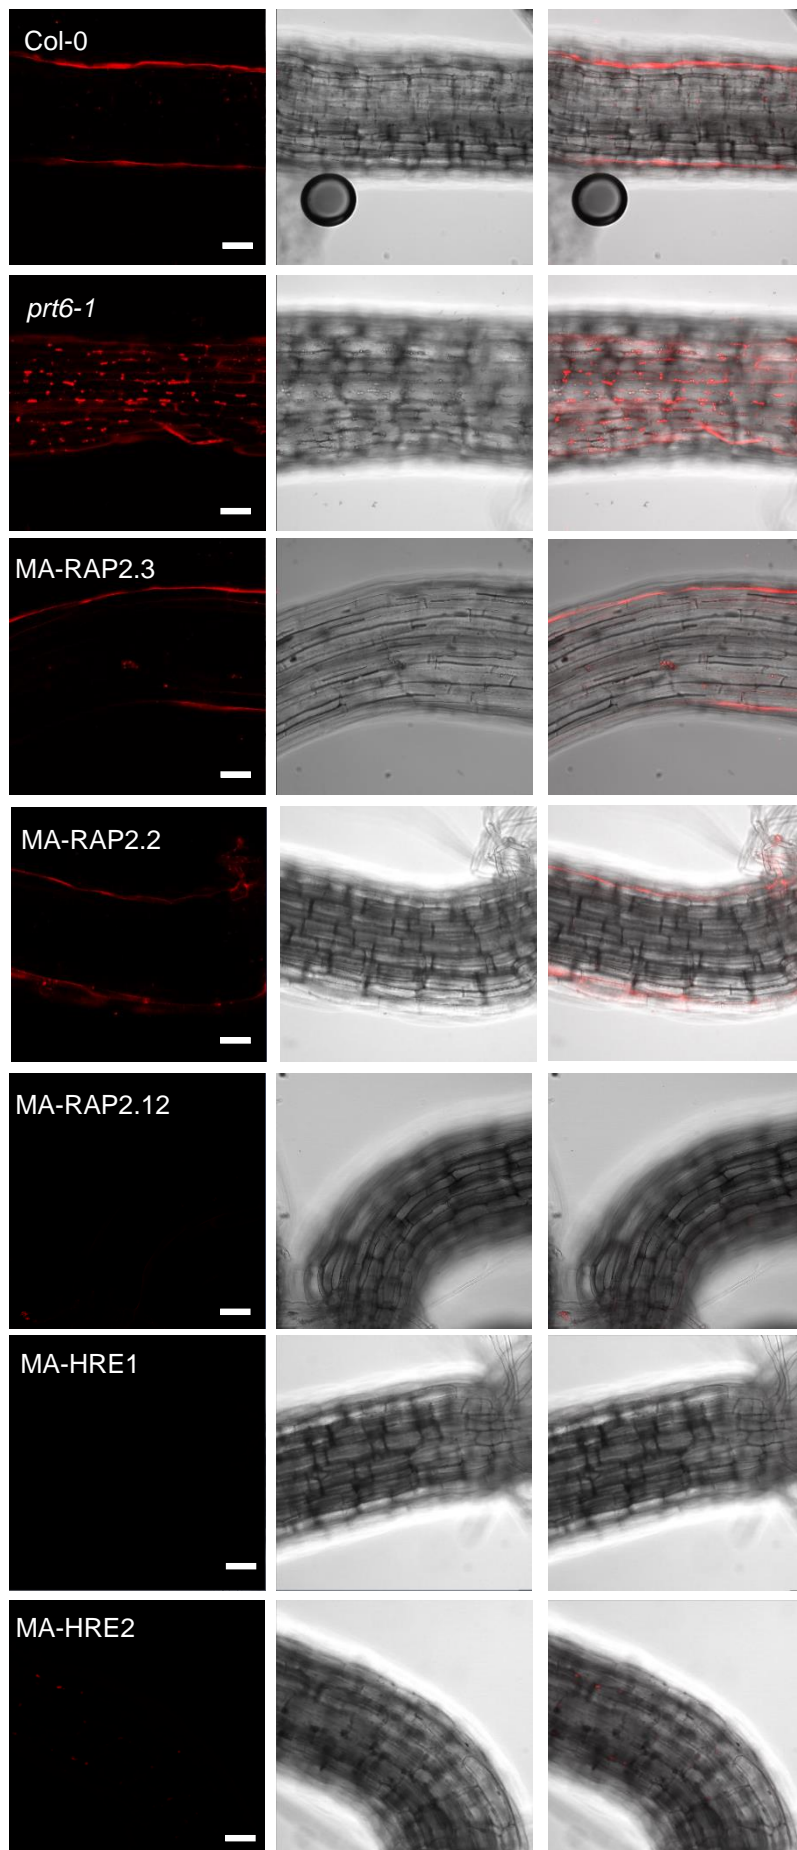

**Supplementary Figure S3. Oil body phenotype of seedlings ectopically expressing stabilised ERFVII transcription factors**

Hypocotyls of 5 d old, light-grown seedlings were stained with Nile Red and visualised by confocal microscopy. Results are representative of two independent transgenic lines for each construct. Left panel: Nile Red; middle panel, bright field, right panel, merge. Bar = 50  $\mu\text{m}$ .



Figure S4

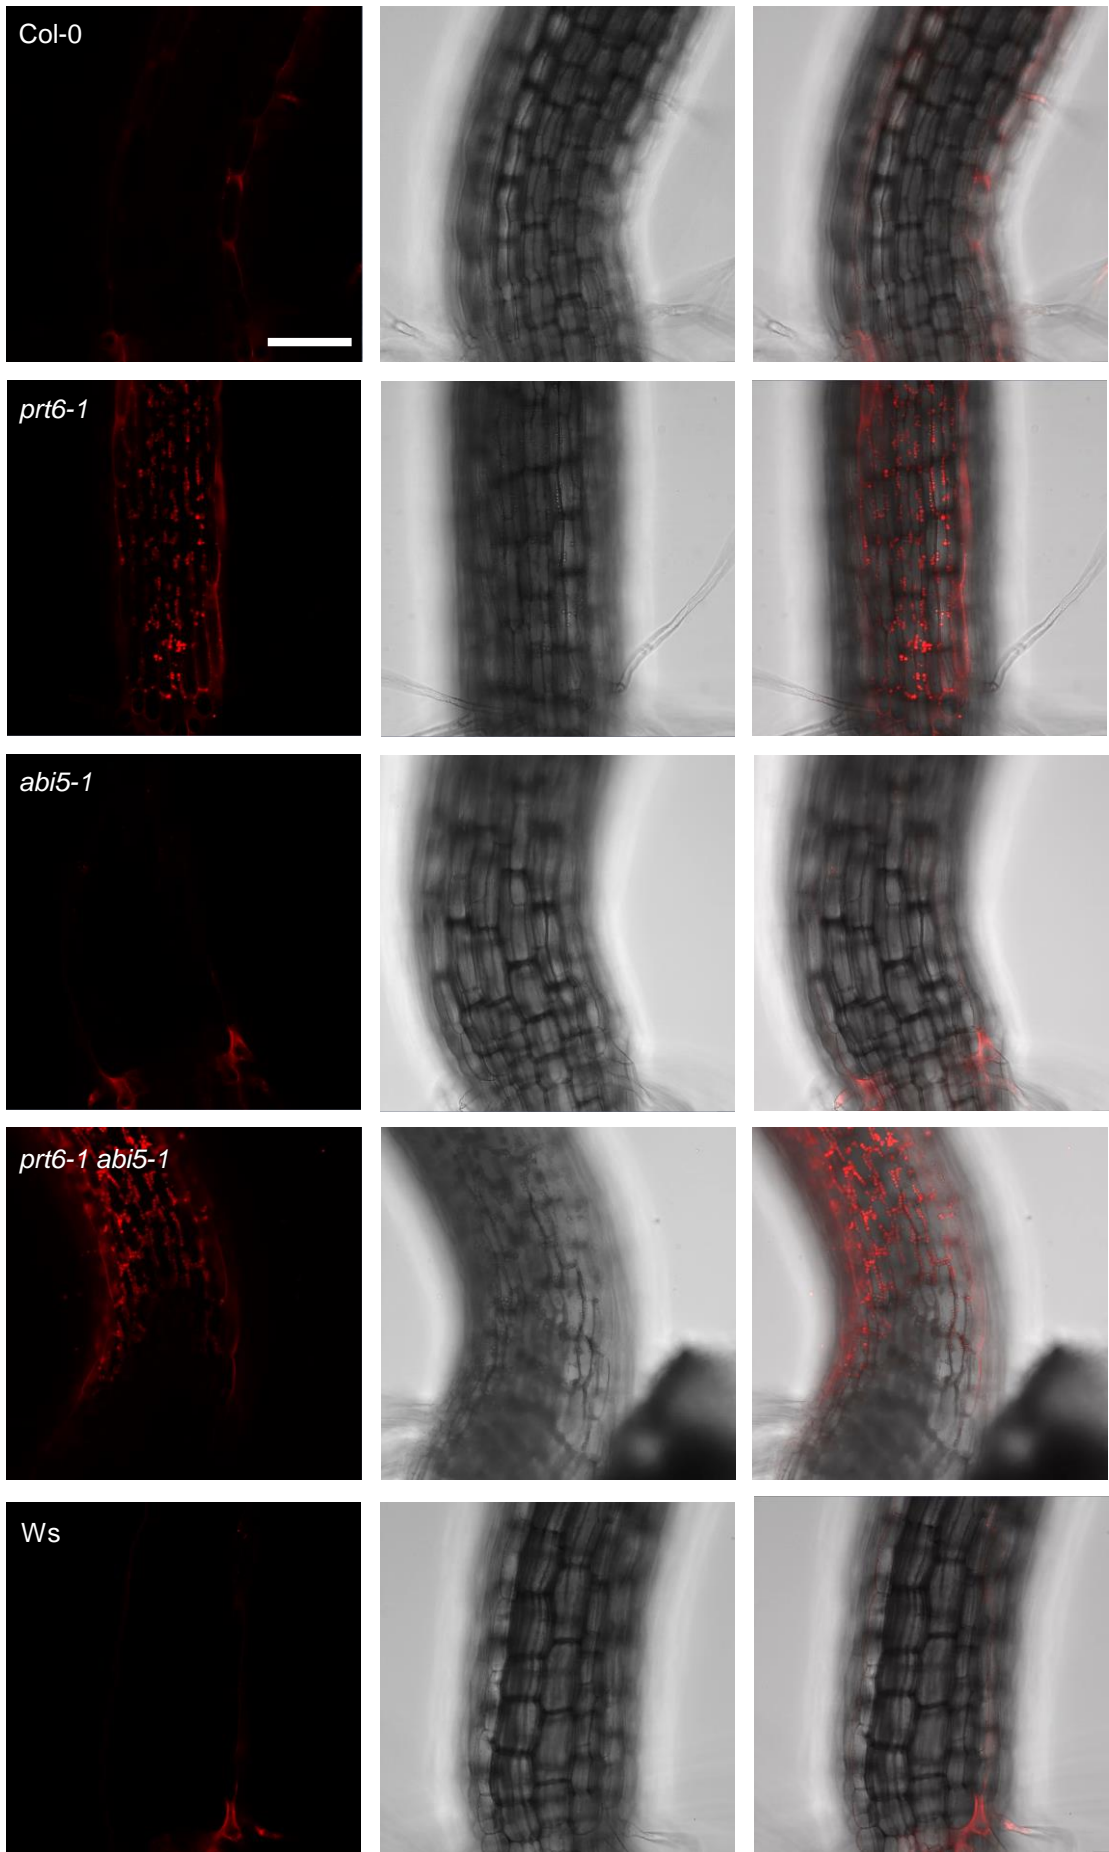

**Supplementary Figure S4. Oil body phenotype of *prt6-1 abi5-1* seedlings**

Hypocotyls of 5 d old, light-grown seedlings were stained with Nile Red and visualised by confocal microscopy. Left panel: Nile Red; middle panel, bright field, right panel, merge. Bar = 100  $\mu$ m.

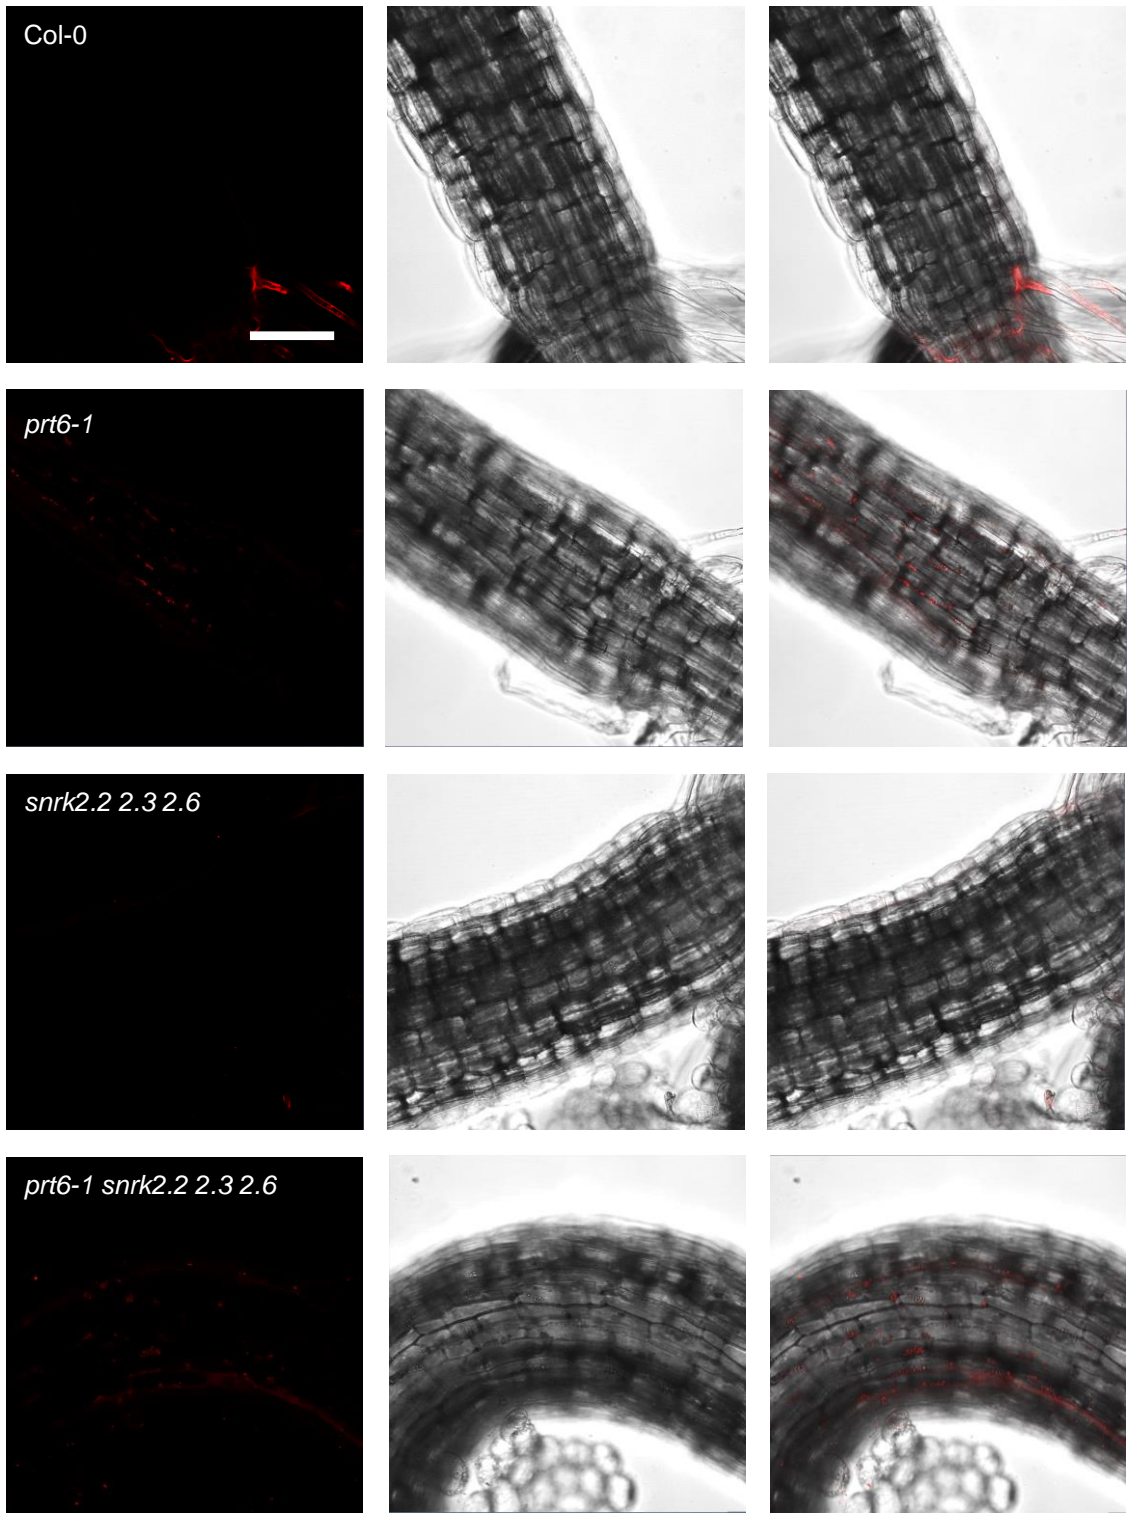

**Supplementary Figure S5. Oil body phenotype of *prt6-1 snrk2.2 2.3 2.6* seedlings**

Hypocotyls of 5 d old, light-grown seedlings were stained with Nile Red and visualised by confocal microscopy. Left panel: Nile Red; middle panel, bright field, right panel, merge. Bar = 100  $\mu$ m.



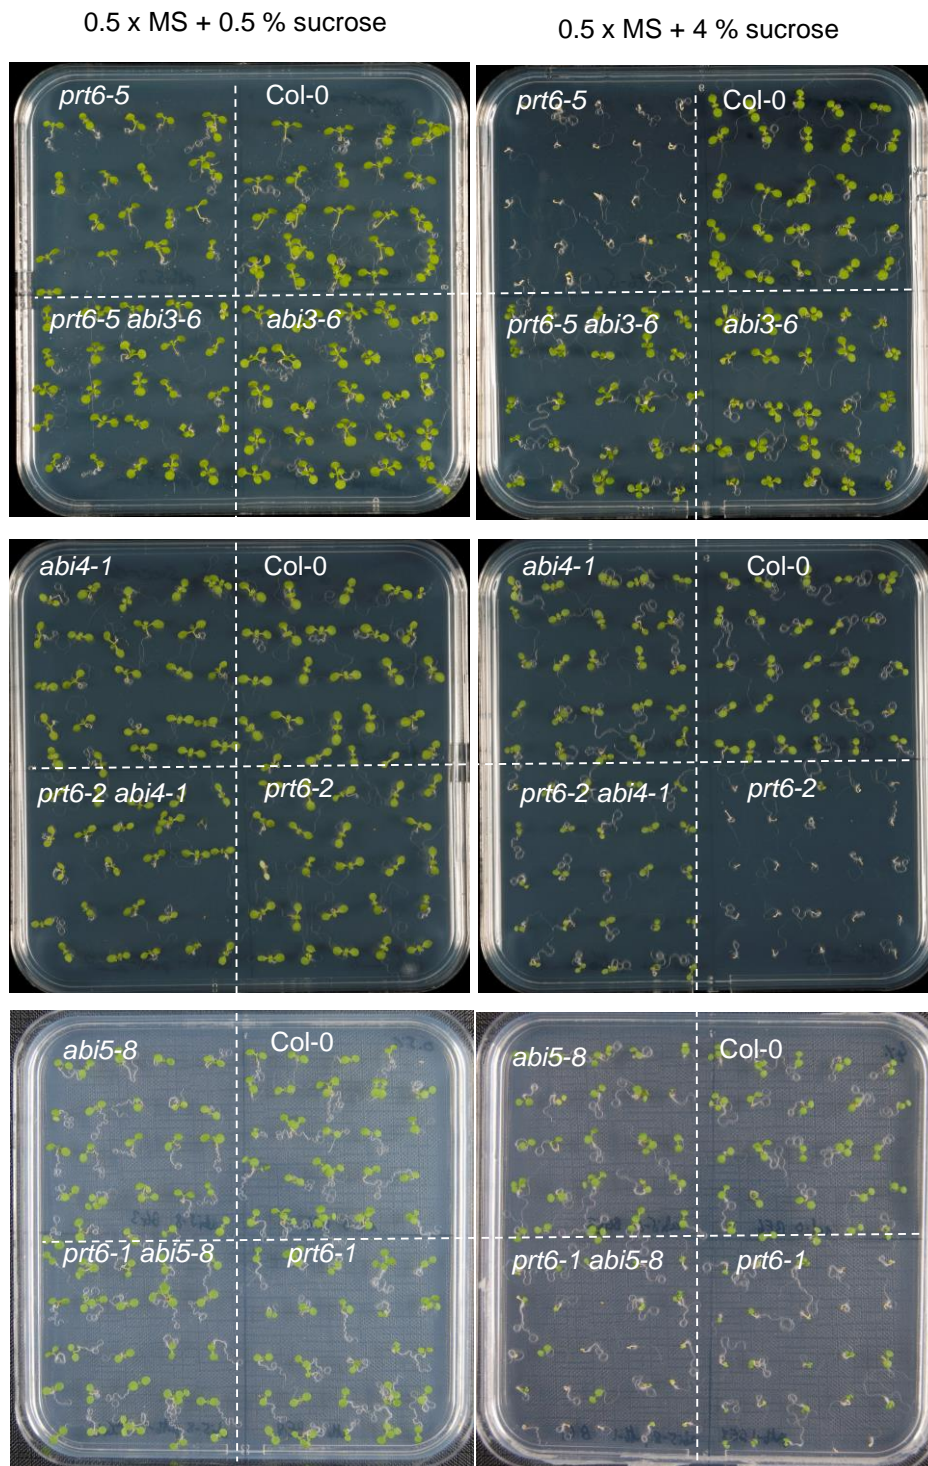

**Supplementary Figure S6. Sugar sensitivity of *prt6* seedling establishment requires ABA signalling**

Seeds of *prt6* and ABA signalling combination mutants were germinated on 0.5 x MS medium containing 0.5 % or 4 % sucrose. Seedlings were photographed after 5 d growth under long days.

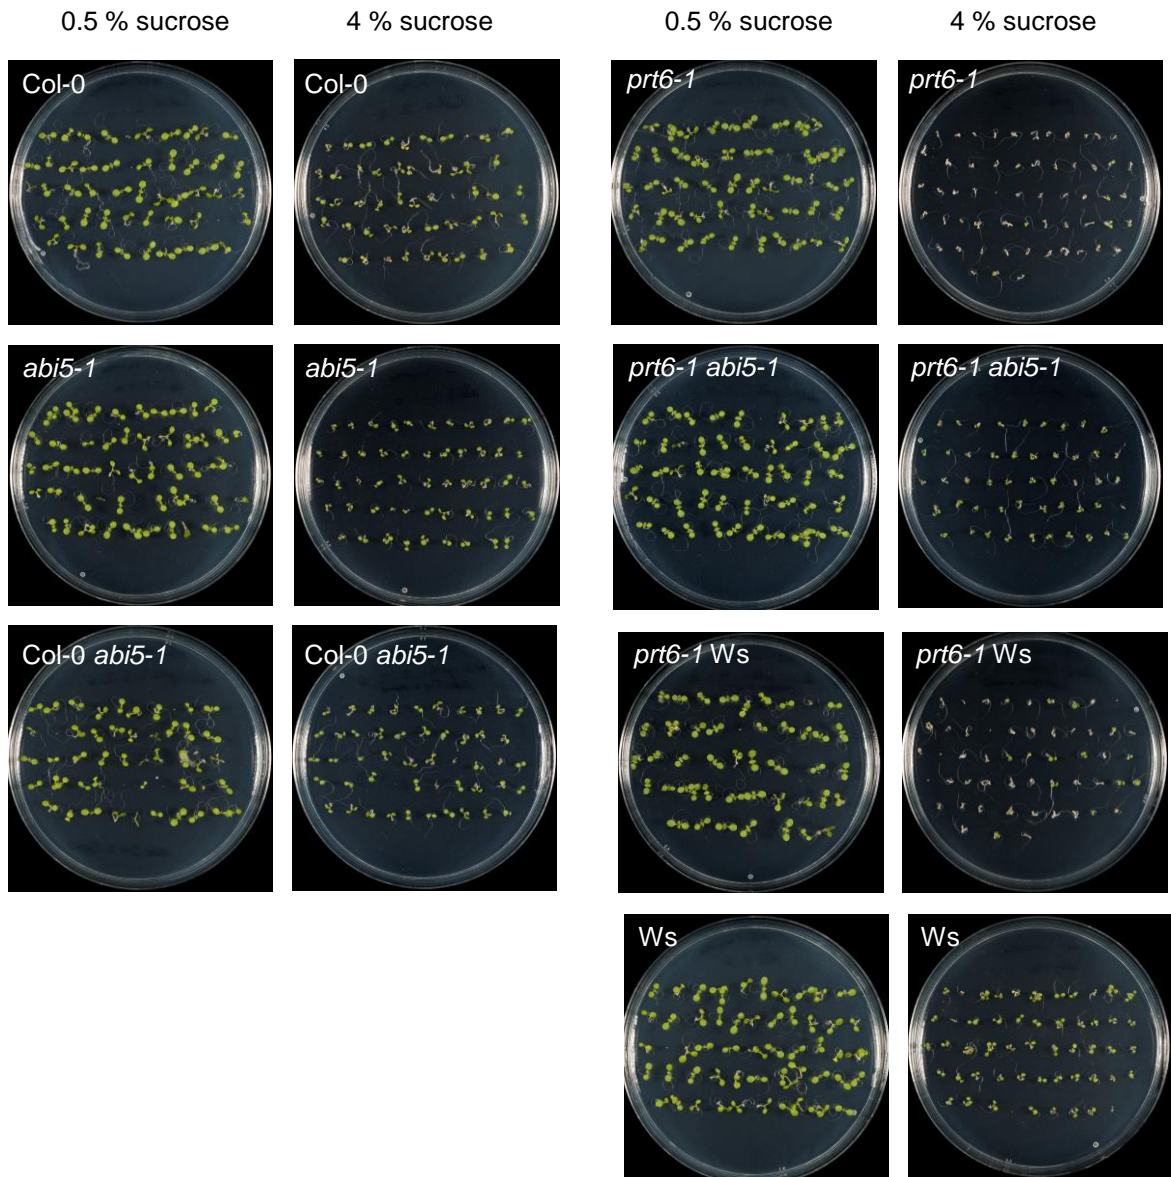

**Supplementary Figure S7. Sugar sensitivity of *prt6* seedling establishment requires *ABI5***

Seeds of *prt6-1* and *abi5-1* combination mutants were germinated on 0.5 x MS medium containing 0.5 % or 4 % sucrose. Seedlings were photographed after 5 d growth under long days.



A

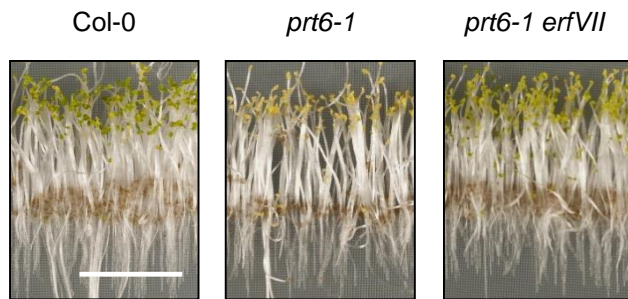

B

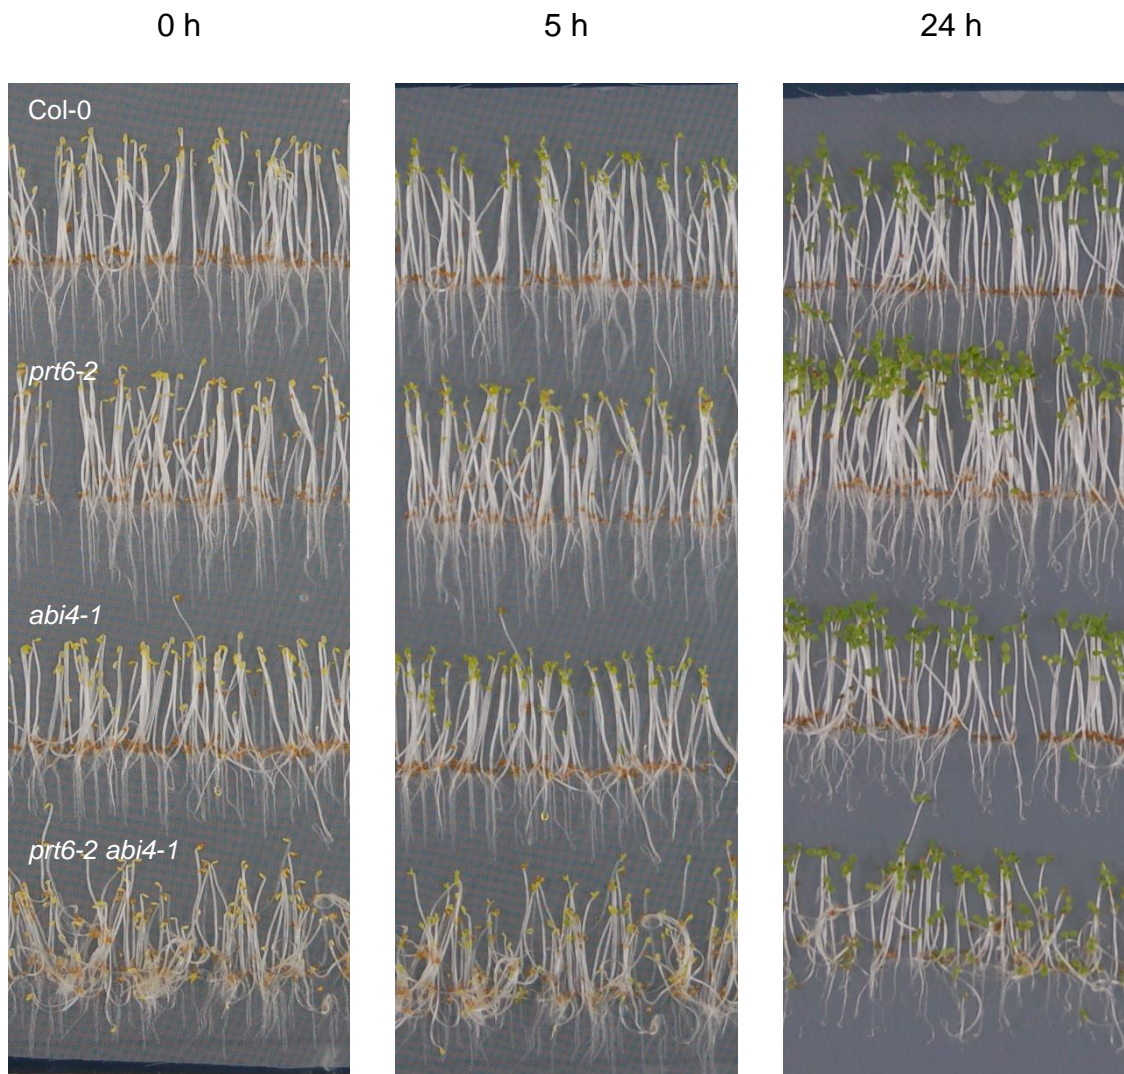

**Supplementary Figure S8. Regreening of etiolated seedlings**

A. Images of Col-0, *prt6-1*, and *prt6-1 erfVII* 6 h after transfer to light. Bar = 1 cm.

B. Images of Col-0, *prt6-2*, *abi4-1* and *prt6-2 abi4-1* seedlings 0, 5 and 24 h after transfer to illumination.

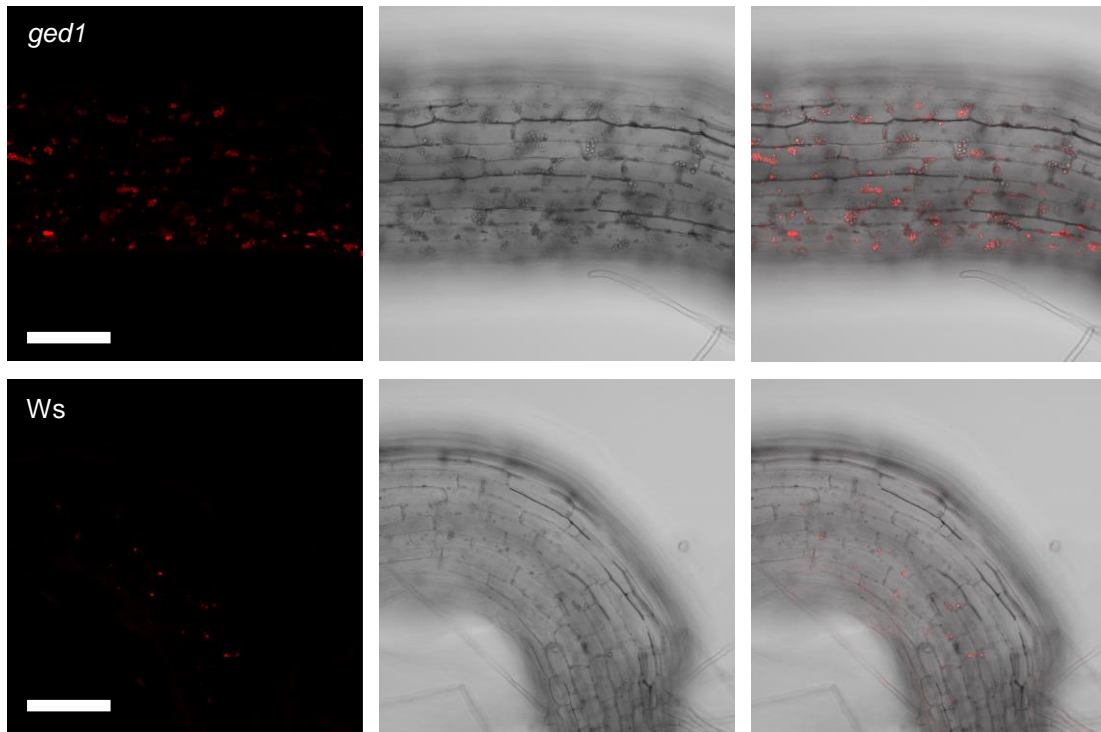

**Supplementary Figure S9. Oil body phenotype of *ged1* seedlings**

Hypocotyls of 5 d old, light-grown seedlings were stained with Nile Red and visualised by confocal microscopy. Left panel: Nile Red; middle panel, bright field, right panel, merge.. Bar = 100  $\mu\text{m}$

**Table S1. *Arabidopsis thaliana* mutants discussed in this study**

| Allele        | Accession  | Mutagen                 | Comments                                                                                                                                                                                                                                                                                                         | Ref    |
|---------------|------------|-------------------------|------------------------------------------------------------------------------------------------------------------------------------------------------------------------------------------------------------------------------------------------------------------------------------------------------------------|--------|
| <i>prt6-1</i> | Col-0      | T-DNA;<br>SAIL_1278_H11 | Null                                                                                                                                                                                                                                                                                                             | 19     |
| <i>prt6-2</i> | Col-0      | T-DNA;<br>GK270G04      | Null                                                                                                                                                                                                                                                                                                             | 19     |
| <i>prt6-4</i> | <i>Ler</i> | Fast neutron            | Null. The <i>prt6-4</i> mutation is an insertion 497178 kb from the top of chromosome 5 into the <i>PRT6</i> (AT5G02310) gene.                                                                                                                                                                                   | 19     |
| <i>prt6-5</i> | Col-0      | T-DNA;<br>SALK_051088   | Null                                                                                                                                                                                                                                                                                                             | 24     |
| <i>ged1</i>   | Ws         | EMS                     | Null <i>prt6</i> allele. Chromosome exchange between two syntenic regions on chromosomes 3 and 5 containing 108 anchors (chromosome 3: At3g09300–At3g12320 and chromosome 5: At5g02100–At5g06980)                                                                                                                | 26     |
| <i>abi3-6</i> | Col-0      | Fast neutron            | Null. The <i>abi3-6</i> mutation carries a 0.75 kb deletion within the region between position 1.078 and 1.944 of the <i>ABI3</i> gene. About one-third of the coding region of the <i>ABI3</i> gene is deleted.                                                                                                 | 61     |
| <i>abi4-1</i> | Col-0      | $\gamma$ -irradiation   | 1 bp deletion ( $\Delta$ G) in codon 157 leading to a frameshift. The resulting protein contains the presumed DNA binding and dimerization domains but lacks the presumed activation domain and is inactive as a transcriptional activator in yeast [37].                                                        | 33, 35 |
| <i>abi5-1</i> | Ws         | T-DNA                   | <i>abi5-1</i> contains a G-to-T substitution resulting in an early translation termination such that the mutant protein lacked 81 C-terminal amino acids, including the conserved basic and leucine zipper domains required for DNA binding and dimerization. The mutation does not co-segregate with the T-DNA. | 36     |
| <i>abi5-8</i> | Col-0      | T-DNA;<br>SALK_013163   | Incomplete loss of function (less severe than <i>abi5-1</i> )                                                                                                                                                                                                                                                    | 20     |



**Table S2 Protein groups with increased abundance in the N-terminome of *prt6* etiolated seedlings that are known to be regulated by *ABI4***

Proteomics datasets from [21] were interrogated with a list of *ABI4* targets compiled from [39].

| <b>AGI code</b> | <b>Description</b>                                           |
|-----------------|--------------------------------------------------------------|
| AT1G48130.1     | 1-cysteine peroxiredoxin 1                                   |
| AT1G54870.1     | NAD(P)-binding Rossmann-fold superfamily protein             |
| AT2G28490.1     | RmlC-like cupins superfamily protein                         |
| AT3G58450.1     | Adenine nucleotide alpha hydrolases-like superfamily protein |
| AT3G15670.1     | Late embryogenesis abundant protein (LEA) family protein     |

**Table S3 Primers used in this study**

| <b>Primer</b>     | <b>Sequence 5'-3'</b>             |
|-------------------|-----------------------------------|
| MA-RAP2.12_F      | AAAAACGCGTATGGCTGGAGGAGCTATAATATC |
| RAP2.12_R         | AAAGGATCCATGTGCGGAGGAGCTGTAAT     |
| MA-RAP2.2_F       | AAAAACGCGTATGGCTGGAGGAGCTATAATC   |
| RAP2.2_R          | AAATCTAGATCAAAGTCTCCTTCCAGCAT     |
| ABI3F             | GCTGGCTCAGCTTCTGCTAT              |
| ABI3R             | AAATTCTTTTCTGGTTTCCATCC           |
| ABI4F             | CCGCTTCTTCTCCTTCCAC               |
| ABI4R             | GAGGGAGGAGAGGTCTTAGGG             |
| ABI5F             | AACATGCATTGGCGGAGT                |
| ABI5R             | TTGTGCCCTTGACTTCAAAC              |
| ACT2F             | CCGCTCTTTCTTTCCAAGC               |
| ACT2R             | CCGGTACCATTGTCACACAC              |
| TUB4F             | GCTGAGAACAGCGATTGTCTT             |
| TUB4R             | AGTTCCCATTCCAGATCCAGT             |
| abi3-6 F3         | CTTGGGCTATATTGAGATCAG             |
| abi3-6 R6         | GGCCAATACATCCAGGTCCCT             |
| abi4-1F1          | CGAGATCCGAGAGCCACGTA              |
| abi4-1R1          | GGTCCCACCATTAAGGAAGA              |
| abi5-1 LP avall   | ACAGCTTTATGGTGTGTTTCAAGG          |
| abi5-1 RP avall   | CCATCTGAAGACACCGGGCTTAAC          |
| abi5-8LP3         | TCACCAGCTAGAAGCTCAACG             |
| abi5-8RP3         | GCTTGGGTCATCATTATATCCG            |
| ged1 V2 prt6 LP   | TTGACATGGAACCGGTAGCC              |
| ged1 V2 prt6 RP   | TGACCATTCCCTATAAGCCGG             |
| ged1 V2 myb3r3 LP | CGTTTGTTTCCGTTTTGTTCCG            |
| ged1 V2 myb3r3 RP | AGTCTCAACTCCAATGACGC              |
